# Supplementary material for: Regulatory Roles of Noncoding RNAs in the Progression of Gastrointestinal Cancers and Health Disparities
Source: Cells. 2022 Aug 7;11(15):2448. doi: 10.3390/cells11152448 (PMC9367924; doi:10.3390/cells11152448)
Supplement: Supplementary file 1 [file cells-11-02448-s001.zip › cells-1829485-supplementary.pdf]

Table S1. List of ncRNAs that could be used as therapeutic targets or biomarkers for gastric cancer.

| ncRNA                                                         | Expression     | Clinical significance                      | Molecular target(s)                                                                                                       | Reference |
|---------------------------------------------------------------|----------------|--------------------------------------------|---------------------------------------------------------------------------------------------------------------------------|-----------|
| lncRNA AB007962                                               | Down regulated | Prognostic biomarker                       | unknown                                                                                                                   | [133]     |
| lncRNA AK025387                                               | Up regulated   | Biomarker                                  | MEK and MAPK signaling pathways                                                                                           | [134]     |
| lncRNA CCAL                                                   | Up regulated   | Biomarker or therapeutic target.           | <i>FOXM1</i>                                                                                                              | [135]     |
| lncRNA CCAT1                                                  | Up regulated   | Biomarker                                  | unknown                                                                                                                   | [136]     |
| lncRNA DANCR                                                  | Up regulated   | Potential biomarker                        | Cell cycle and metabolism                                                                                                 | [137]     |
| lncRNA DDX11-AS1                                              | Up regulated   | Biomarker and therapeutic target           | MiR-326/ <i>IRS1</i> Axis                                                                                                 | [138]     |
| lncRNA DLX6-AS1                                               | Up regulated   | Biomarker and therapeutic target           | MiR-204-5p/ <i>OCT1</i>                                                                                                   | [139]     |
| lncRNA EIF3J-DT                                               | UP regulated   | Resistance against oxaliplatin and 5FU     | <i>ATG14</i>                                                                                                              | [140]     |
| lncRNA FLJ22763                                               | Down regulated | Prognostic biomarker                       | <i>ACLY</i>                                                                                                               | [141]     |
| lncRNA GPC5-AS1                                               | Down regulated | Biomarker and therapeutic target           | <i>GPC5</i>                                                                                                               | [142]     |
| lncRNA H19                                                    | Up regulated   | Biomarker                                  | unknown                                                                                                                   | [143]     |
| lncRNA HOTAIR                                                 | Up regulated   | Prognostic marker                          | unknown                                                                                                                   | [144]     |
| lncRNA HOXD-AS2                                               | Down regulated | Biomarker                                  | PI3K/Akt Signaling Pathway                                                                                                | [145]     |
| lncRNA ITPK1-AS1, KCNQ1DN, LINC0016, LINC00173, and LINC00307 | Up regulated   | Prognostic biomarker                       | Cell adhesion, cytokine-cytokine receptor interaction, chemokine signaling pathway, leukocyte trans-endothelial migration | [146]     |
| lncRNA KCNQ1OT1                                               | Up regulated   | Therapeutic target                         | miR-145-5p/ <i>ARF6</i> Axis                                                                                              | [147]     |
| lncRNA linc00152                                              | Up regulated   | Biomarker                                  | MicroRNA-193b-3p/ <i>ETS1</i> Axis.                                                                                       | [148]     |
| lncRNA LINC00200                                              | Up regulated   | Biomarker and therapeutic target           | Hormone secretion                                                                                                         | [149]     |
| lncRNA Linc00483                                              | Up regulated   | Prognostic biomarker or therapeutic target | MAPKs                                                                                                                     | [150]     |
| lncRNA LINC00857                                              | Up regulated   | Prognostic marker                          | <i>Cyclin D1 and E1</i>                                                                                                   | [151]     |

|                                                             |                                   |                                                                     |                                                                                       |       |
|-------------------------------------------------------------|-----------------------------------|---------------------------------------------------------------------|---------------------------------------------------------------------------------------|-------|
| lncRNA<br>LINC00924                                         | Up regulated                      | Prognostic biomarker                                                | unknown                                                                               | [152] |
| lncRNA<br>LINC00941                                         | Up regulated                      | Prognostic biomarker                                                | PI3K/AKT Signaling Pathway                                                            | [153] |
| lncRNA<br>LINC01133                                         | Down regulated                    | Prognostic biomarker<br>and anti-metastatic<br>therapeutic target   | Wnt/ $\beta$ -Catenin Pathway                                                         | [154] |
| lncRNA<br>LINC01279                                         | Up regulated                      | Prognostic biomarker                                                | miR-143-3p/ <i>SERPINE1</i> Axis                                                      | [155] |
| lncRNA<br>MALAT1                                            | Up regulated                      | Therapeutic target                                                  | VE-cadherin, $\beta$ -catenin, MMPs 2 and 9,<br>MT1-MMP, p-ERK, p-FAK, and p-paxillin | [156] |
| lncRNA<br>MEF2C-AS1<br>and FENDRR                           | Up regulated                      | Biomarkers                                                          | <i>FAT3</i> , <i>NTN1</i> and <i>LYVE1</i>                                            | [157] |
| lncRNA<br>NR_026827                                         | Down regulated                    | Biomarker in those<br>associated with <i>H. pylori</i><br>infection | unknown                                                                               | [158] |
| lncRNA<br>PICART1                                           | Down regulated                    | Biomarker                                                           | PI3K/AKT and MAPK/ERK Signaling<br>Pathways                                           | [159] |
| lncRNA RP11-<br>397A15.4                                    | Up regulated                      | Biomarker                                                           | unknown                                                                               | [160] |
| lncRNA<br>SNHG11                                            | Up regulated                      | Biomarker                                                           | Wnt/ $\beta$ -Catenin Pathway                                                         | [161] |
| lncRNA<br>XLOC_010235                                       | Up regulated                      | Therapeutic target                                                  | <i>Snail1</i>                                                                         | [162] |
| lncRNA ZEB1-<br>AS1                                         | Up regulated                      | Prognostic biomarker                                                | <i>ZEB1</i>                                                                           | [163] |
| lncRNAs<br>hsa_circ_010339<br>8 and<br>hsa_circ_012785<br>9 | Up regulated                      | Prognostic biomarkers                                               | unknown                                                                               | [164] |
| lncRNAs HULC<br>and ZNFX1-<br>AS1                           | Up regulated                      | Biomarkers                                                          | unknown                                                                               | [165] |
| miR-122-5p                                                  | Down regulated                    | Therapeutic target                                                  | <i>GIT1</i>                                                                           | [166] |
| miR-125b                                                    | Up regulated                      | Prognostic biomarker                                                | <i>HER2</i>                                                                           | [167] |
| miR-383                                                     | Down regulated                    | Prognostic biomarker                                                | <i>SGCZ</i>                                                                           | [168] |
| miRNA-200c,<br>miRNA-139 and<br>lncRNA H19                  | Up<br>regulated/Down<br>regulated | Biomarkers                                                          | <i>FGF-18/FGF-R</i>                                                                   | [169] |

Table S2. List of ncRNAs that could be used as therapeutic targets or biomarkers for pancreatic cancer.

| ncRNA                       | Expression    | Clinical significance               | Molecular target(s)          | Reference |
|-----------------------------|---------------|-------------------------------------|------------------------------|-----------|
| circRNA ciRS-7              | upregulated   | Biomarker and therapeutic target    | EGFR/STAT3 signaling pathway | [170]     |
| circRNA RTN4                | Upregulated   | Biomarker                           | <i>RAB11FIP1</i>             | [171]     |
| lncRNA H19/miR-675          | Upregulated   | Diagnostic or prognostic biomarker  | <i>E2F-1</i>                 | [172]     |
| lncRNA Linc-ROR             | Upregulated   | Therapeutic target                  | <i>let-7</i>                 | [173]     |
| lncRNA AB209630             | Downregulated | Inhibits Gemcitabine Resistance     | PI3K/AKT Signaling pathway   | [174]     |
| lncRNA CERS6-AS1            | Upregulated   | Therapeutic target                  | <i>FGFR1</i>                 | [175]     |
| lncRNA DGCR5                | Downregulated | Therapeutic target                  | <i>PDCD4</i>                 | [176]     |
| lncRNA DLEU1                | Upregulated   | Prognostic biomarker                | miR-381/CXCR4 axis           | [177]     |
| lncRNA FEZF1-AS1            | Upregulated   | Therapeutic target                  | miR-107/ <i>ZNF312B</i> axis | [178]     |
| lncRNA H19                  | Upregulated   | Biomarker                           | PFTK1 and Wnt signaling      | [179]     |
| lncRNA HOTTIP               | Upregulated   | Therapeutic target                  | <i>WDR5</i> and <i>KRAS</i>  | [180]     |
| lncRNA ITGB2-AS1            | Upregulated   | Therapeutic target                  | <i>RAF1</i>                  | [181]     |
| lncRNA LINC00460            | Upregulated   | Therapeutic target                  | unknown                      | [182]     |
| lncRNA LINC00483            | Upregulated   | Therapeutic target                  | TBK1/MAPK axis               | [183]     |
| lncRNA LINC00657            | Upregulated   | Therapeutic target                  | <i>PAK4</i>                  | [184]     |
| lncRNA linc00673/miR-150-5p | Downregulated | Prognostic biomarker                | EMT regulator ZEB1           | [185]     |
| lncRNA LINC00941            | Upregulated   | Therapeutic target                  | Hippo signaling pathway      | [186]     |
| lncRNA LINC01234            | Up regulated  | Therapeutic target                  | Aspartate metabolism         | [187]     |
| lncRNA LUCAT1               | Upregulated   | Biomarker                           | miR-539                      | [188]     |
| lncRNA MALAT1               | Upregulated   | Diagnostic and prognostic biomarker | <i>ZEB1</i> , <i>KRAS</i>    | [189,190] |
| lncRNA MSC-AS1              | Upregulated   | Therapeutic target                  | <i>CDK14</i>                 | [191]     |
| lncRNA NEAT1                | Upregulated   | Biomarker                           | <i>RELA</i>                  | [192]     |
| lncRNA NONHSAT105177        | Downregulated | Therapeutic target                  | <i>Clusterin</i>             | [193]     |

|                   |               |                                          |                           |       |
|-------------------|---------------|------------------------------------------|---------------------------|-------|
| lncRNA OIP5-AS1   | Upregulated   | Therapeutic target                       | MiR-429/FOXD1/ERK Pathway | [194] |
| lncRNA PCED1B-AS1 | Upregulated   | Biomarker                                | <i>HIF-1A</i>             | [195] |
| lncRNA PTTG3P     | Upregulated   | Prognostic marker and therapeutic target | <i>FOXM1</i>              | [196] |
| lncRNA PVT1       | Upregulated   | Biomarker                                | <i>HIF-1A</i>             | [197] |
| lncRNA PWAR6      | Downregulated | Biomarker and therapeutic target         | YAP signaling             | [198] |
| lncRNA THAP9-AS1  | Upregulated   | Prognostic biomarker                     | YAP signaling             | [199] |
| lncRNA TP73-AS1   | Upregulated   | Biomarker and therapeutic target         | YAP signaling             | [200] |

Table S3. List of ncRNAs that could be used as therapeutic targets or biomarkers for liver cancer.

| ncRNA                  | Expression     | Clinical significance              | Molecular target(s)                              | Reference |
|------------------------|----------------|------------------------------------|--------------------------------------------------|-----------|
| lncRNA A1BG-AS1        | Down regulated | Biomarker                          | Phosphatase and tensin homolog, and <i>SMAD7</i> | [201]     |
| lncRNA AF113014        | Down regulated | Therapeutic target                 | Mir-20a/ <i>Egr2</i>                             | [202]     |
| lncRNA AL033381.2      | Up regulated   | Biomarker and therapeutic target   | <i>PRKRA</i>                                     | [203]     |
| lncRNA AWPPH           | Up regulated   | Prognostic biomarker               | <i>YBX1</i>                                      | [204]     |
| lncRNA CCAT2 and FOXM1 | Up regulated   | Therapeutic target                 | miR-34a/ <i>FOXM1</i> / <i>CCAT2</i> axis        | [205]     |
| lncRNA CDKN2B-AS1      | Up regulated   | Prognostic biomarker               | <i>CDK2</i> , <i>CDK4</i> and <i>P16</i>         | [206]     |
| lncRNA D16366          | Down regulated | Diagnostic or prognostic biomarker | unknown                                          | [207]     |
| lncRNA FAL1            | Up regulated   | Biomarker and therapeutic target   | miR-1236                                         | [208]     |
| lncRNA GAS5            | Down regulated | Therapeutic target                 | <i>ANGPTL1</i>                                   | [209]     |
| lncRNA HOXA11-AS       | Up regulated   | Therapeutic target                 | <i>LATS1</i>                                     | [210]     |
| lncRNA HOXC13-AS       | Up regulated   | Prognostic biomarker               | unknown                                          | [211]     |
| lncRNA HULC            | Up regulated   | Therapeutic target                 | <i>Sirt1</i> and <i>COX-2</i>                    | [212,213] |
| lncRNA LINC00161       | Up regulated   | Prognostic biomarker               | unknown                                          | [214]     |

|                      |                |                                  |                                                                                                                    |           |
|----------------------|----------------|----------------------------------|--------------------------------------------------------------------------------------------------------------------|-----------|
| lncRNA LINC00324     | Up regulated   | Therapeutic target               | Fas ligand via PU box binding protein                                                                              | [215]     |
| lncRNA LINC00346     | Up regulated   | Biomarker                        | JAK-STAT3 pathway                                                                                                  | [216]     |
| lncRNA LINC00963     | Up regulated   | Biomarker                        | PI3K/AKT Pathway                                                                                                   | [217]     |
| lncRNA LINC01554     | Down regulated | Prognostic biomarker             | Akt/MTOR Signaling Pathway                                                                                         | [218]     |
| lncRNA lncAY         | Up regulated   | Biomarker                        | Myb/MEF2C acetylation                                                                                              | [219]     |
| lncRNA MEG3          | Down regulated | Biomarker                        | <i>TGF-<math>\beta</math>1</i>                                                                                     | [220]     |
| lncRNA MIR4435-2HG   | Up regulated   | Biomarker and therapeutic target | miRNA-487a, and miR-22-3p/YWHAZ axis                                                                               | [221,222] |
| lncRNA miR503HG      | Down regulated | Prognostic biomarker             | HNRNPA2B1/NF-KB signaling pathway                                                                                  | [223]     |
| lncRNA MYLK-AS1      | Up regulated   | Therapeutic target               | EGFR/HER2 and ERK1/2 pathway                                                                                       | [224]     |
| lncRNA NEAT1         | Up regulated   | Biomarker and therapeutic target | viral carcinogenesis, transcriptional misregulation in cancer, P53 signaling pathways, miR-129-5p-VCP-I $\kappa$ B | [225,226] |
| lncRNA OR3A4         | Up regulated   | Prognostic biomarker             | AGGF1/Akt/mTOR pathway                                                                                             | [227]     |
| lncRNA PARP1         | Up regulated   | Prognostic biomarker             | <i>PARP1</i>                                                                                                       | [228]     |
| lncRNA PHAROH        | Up regulated   | Biomarker and therapeutic target | <i>TIAR</i>                                                                                                        | [229]     |
| lncRNA PINT87aa      | Up regulated   | Therapeutic target               | FOXM1/ PHB2 axis                                                                                                   | [230]     |
| lncRNA PVT1          | Up regulated   | Therapeutic target               | miR-424-5p/ <i>INCENP</i> axis                                                                                     | [231]     |
| lncRNA RMRP          | Up regulated   | Prognostic biomarker             | miRNA-206/ <i>TACR1</i>                                                                                            | [232]     |
| lncRNA RNA-ROR       | Up regulated   | Therapeutic target               | <i>ZEB2</i>                                                                                                        | [233]     |
| lncRNA ROR1-AS1      | Up regulated   | Prognostic biomarker             | WNT signaling pathway                                                                                              | [234]     |
| lncRNA RP11-286H15.1 | Down regulated | Therapeutic target               | ubiquitination of PABPC4                                                                                           | [235]     |
| lncRNA SNHG17        | Up regulated   | Therapeutic target               | cell cycle G0/G1 phase arrest and apoptosis                                                                        | [236]     |
| lncRNA SNHG20        | Up regulated   | Prognostic biomarker             | <i>ZEB1, ZEB2, N-cadherin, Vimentin, and E-cadherin</i>                                                            | [237]     |
| lncRNA SNHG7         | Up regulated   | Therapeutic target               | <i>FAIM2</i>                                                                                                       | [238]     |
| lncRNA SNHG8         | Up regulated   | Prognostic biomarker             | miR-149-5p/ <i>PPM1F</i>                                                                                           | [239]     |

|                                                                                                              |              |                                          |                                                                                                                                                                          |       |
|--------------------------------------------------------------------------------------------------------------|--------------|------------------------------------------|--------------------------------------------------------------------------------------------------------------------------------------------------------------------------|-------|
| lncRNA SNHG9                                                                                                 | Up regulated | Therapeutic target                       | GSTP1 Methylation                                                                                                                                                        | [240] |
| lncRNA SUMO1P3                                                                                               | Up regulated | Prognostic marker and therapeutic target | <i>Cyclin D1</i> and Akt phosphorylation                                                                                                                                 | [241] |
| lncRNA TGFB2-AS1                                                                                             | Up regulated | Prognostic biomarker                     | Apoptosis                                                                                                                                                                | [242] |
| lncRNA TGLC15                                                                                                | Up regulated | Therapeutic target                       | SOX4                                                                                                                                                                     | [243] |
| lncRNA THEMIS2-211                                                                                           | Up regulated | Therapeutic target                       | miR-940/ <i>SPOCK1</i> axis                                                                                                                                              | [244] |
| lncRNA TRPM2-AS                                                                                              | Up regulated | Biomarker                                | <i>TRPM2</i>                                                                                                                                                             | [245] |
| lncRNA TSPAN12                                                                                               | Up regulated | Biomarker and therapeutic target         | Cell cycle, ECM–receptor interaction, focal adhesion, and p53, PI3K-Akt, and AMPK signaling pathways.                                                                    | [246] |
| lncRNAs AC009005.2, RP11-363N22.3, RP11-932O9.10, RP11-572O6.1, RP11-190C22.8, RP11-388C12.8, and ZFPM2-AS1. | Up regulated | Prognostic biomarkers                    | Cell cycle, spliceosome, Fanconi anemia pathway, DNA replication, mRNA surveillance pathway, homologous recombination, RNA transport, and ubiquitin mediated proteolysis | [247] |
| lncRNAs MSC-AS1, POLR2J4, EIF3J-AS1, SERHL, RMST, and PVT1.                                                  | Up regulated | Prognostic biomarkers                    | TGF- $\beta$ signaling and apoptosis pathways                                                                                                                            | [248] |
| lncRNAs TSPEAR-AS1, LINC00511, LINC01136, MKLN1-AS, LINC00506, KRTAP5-AS1, ZNF252P-AS1, and THUMPD3-AS1      | Up regulated | Prognostic biomarker                     | Target cell cycle-related biological processes and pathways.                                                                                                             | [249] |
| miR-500a                                                                                                     | Up regulated | Prognostic marker and therapeutic target | <i>BID</i>                                                                                                                                                               | [250] |

Table S4. List of ncRNAs that could be used as therapeutic targets or biomarkers for esophageal cancer.

| ncRNA                                                                                       | Expression     | Clinical significance                    | Molecular target(s)                                         | Reference |
|---------------------------------------------------------------------------------------------|----------------|------------------------------------------|-------------------------------------------------------------|-----------|
| lncRNA BANCR                                                                                | Up regulated   | Prognostic biomarker                     | <i>Notch2</i>                                               | [251]     |
| lncRNA CAF                                                                                  | Down regulated | Therapeutic target                       | <i>HIF-1A</i>                                               | [252]     |
| lncRNA CASC9                                                                                | Up regulated   | Diagnostic or prognostic biomarker       | <i>PDCD4</i> expression through <i>EZH2</i>                 | [253]     |
| lncRNA GHET1                                                                                | Up regulated   | Therapeutic target                       | <i>Vimentin</i> , <i>N-cadherin</i> , and <i>E-cadherin</i> | [254]     |
| lncRNA H19                                                                                  | Up regulated   | Prognostic biomarker                     | unknown                                                     | [255]     |
| lncRNA Linc00460                                                                            | Up regulated   | Prognostic biomarker                     | CBP/P300                                                    | [256]     |
| lncRNA LINC01980                                                                            | Up regulated   | Prognostic marker and therapeutic target | <i>GADD45A</i>                                              | [257]     |
| lncRNA PCAT-1                                                                               | Up regulated   | Therapeutic target                       | <i>ANXA10</i>                                               | [258]     |
| lncRNA SEMA3B and SEMA3B-AS1                                                                | Down regulated | Prognostic biomarker                     | <i>semaphorin</i>                                           | [259]     |
| lncRNA SNHG16                                                                               | Up regulated   | Prognostic biomarker                     | Wnt/ $\beta$ -Catenin Signaling Pathway                     | [260]     |
| lncRNAs - BQ376030, ASLNC11164, BF894811, RP11-473M20.9, XLOC_007869, XLOC_006476, CK327190 | Up regulated   | Prognostic biomarkers                    | Wnt/ $\beta$ -Catenin Signaling Pathway                     | [261]     |
| lncRNAs AC008440.10                                                                         | Down regulated | Biomarker                                | unknown                                                     | [262]     |
| lncRNAs AK001796                                                                            | Up regulated   | Prognostic biomarker                     | SP1/NF-KB pathway                                           | [263]     |
| lncRNAs ANRIL                                                                               | Up regulated   | Prognostic marker and therapeutic target | unknown                                                     | [264]     |
| lncRNAs DLX6-AS1                                                                            | Up regulated   | Therapeutic target                       | <i>DLX6</i>                                                 | [265]     |
| lncRNAs FOXD2-AS1                                                                           | Up regulated   | Prognostic biomarker                     | <i>FOXD2</i>                                                | [266]     |
| lncRNAs LEF1-AS1                                                                            | Up regulated   | Prognostic biomarker                     | <i>LEF1</i>                                                 | [267]     |

|                                                                                                          |                                       |                                       |                                |           |
|----------------------------------------------------------------------------------------------------------|---------------------------------------|---------------------------------------|--------------------------------|-----------|
| lncRNAs<br>LINC00152                                                                                     | Up regulated                          | Prognostic biomarker                  | MiR-153-3p/ <i>FYN</i> Axis    | [268]     |
| lncRNAs<br>LINC00324,<br>LOC100507053                                                                    | Up regulated<br>and down<br>regulated | Biomarker                             | hsa-miR-493-5p                 | [269]     |
| lncRNAs<br>LINC00634                                                                                     | Up regulated                          | Prognostic biomarker                  | MiR-342-3p/ <i>Bcl2L1</i> Axis | [270]     |
| lncRNAs<br>LINC01133                                                                                     | Down regulated                        | Prognostic biomarker                  | unknown                        | [271]     |
| lncRNA<br>MIR31HG                                                                                        | Up regulated                          | Biomarker                             | <i>Furin</i> and <i>MMP1</i>   | [272]     |
| lncRNAs<br>NR_039819,<br>NR_036133,<br>NR_003353,<br>ENST000004424<br>16.1, and<br>ENST000004161<br>00.1 | Up regulated                          | Biomarkers                            | unknown                        | [273]     |
| lncRNA<br>PANDA                                                                                          | Up regulated                          | Biomarker and<br>therapeutic target   | <i>NF-YA</i> and <i>SAFA</i>   | [274]     |
| lncRNA RP11-<br>169D4.1-001                                                                              | Down regulated                        | Biomarker                             | unknown                        | [275]     |
| lncRNA<br>SNHG12                                                                                         | Down regulated                        | Prognostic biomarker                  | miRNA-195-5p/ <i>BCL9</i>      | [276]     |
| lncRNA<br>SNHG6                                                                                          | Up regulated                          | Diagnostic or prognostic<br>biomarker | <i>EZH2</i>                    | [277,278] |
| lncRNA SPRY4-<br>IT1                                                                                     | Up regulated                          | Prognostic biomarker                  | unknown                        | [279]     |
| lncRNA<br>VESTAR                                                                                         | Up regulated                          | Therapeutic target                    | <i>VEGFC</i>                   | [280]     |
| lncRNAs: RP11-<br>366H4.1.1,<br>LINC00460 and<br>AC093850.2                                              | Up regulated                          | Prognostic biomarker                  | cell cycle                     | [281]     |
| miR-1290                                                                                                 | Up regulated                          | Prognostic biomarker                  | <i>Nuclear Factor I/X</i>      | [282]     |
| miR-138                                                                                                  | Down regulated                        | Prognostic biomarker                  | unknown                        | [283]     |
| miR-145                                                                                                  | Down regulated                        | Prognostic biomarker                  | <i>c-Myc</i>                   | [284]     |
| miR-191                                                                                                  | Up regulated                          | Therapeutic target                    | <i>EGR1</i>                    | [285]     |
| miR-25/miR-203                                                                                           | Up regulated<br>and down<br>regulated | Biomarkers                            | unknown                        | [286]     |

|                        |                |                      |                         |       |
|------------------------|----------------|----------------------|-------------------------|-------|
| miR-455-3p             | Down regulated | Prognostic biomarker | <i>FAM83F</i>           | [287] |
| miR-503 and<br>miR-375 | Up regulated   | Biomarker            | unknown                 | [288] |
| Uc.189                 | Up regulated   | Biomarker            | NF-KB signaling pathway | [289] |
